# Supplementary material for: Adsorption Behavior of Selective Recognition Functionalized Biochar to Cd(II) in Wastewater
Source: PubMed Central journal article supplement (PMC5848996; doi:10.3390/ma11020299), 2018-02-14
Supplement: materials-11-00299-s001.pdf [file materials-11-00299-s001.pdf]

Supplementary

# Adsorption Behavior of Selective Recognition Functionalized Biochar to Cd(II) in Wastewater

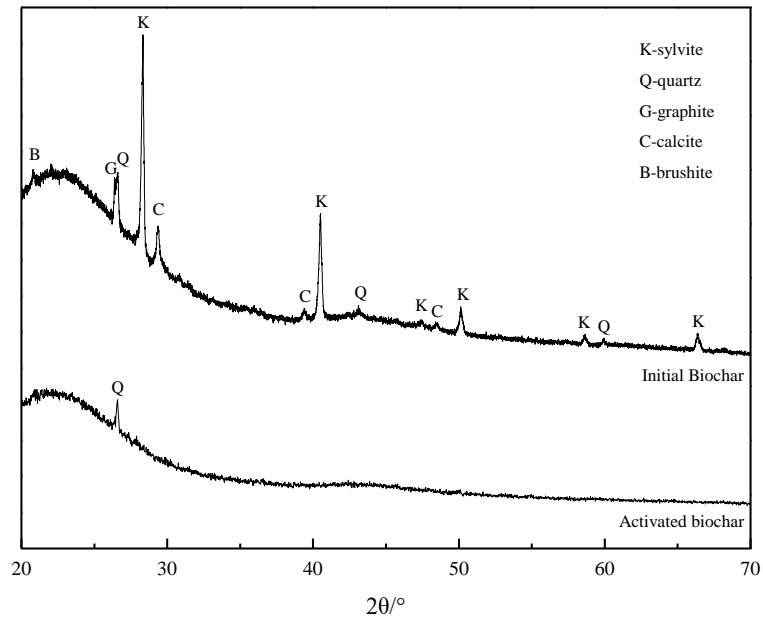

Figure S1 XRD patterns of initial biochar and activated biochar.

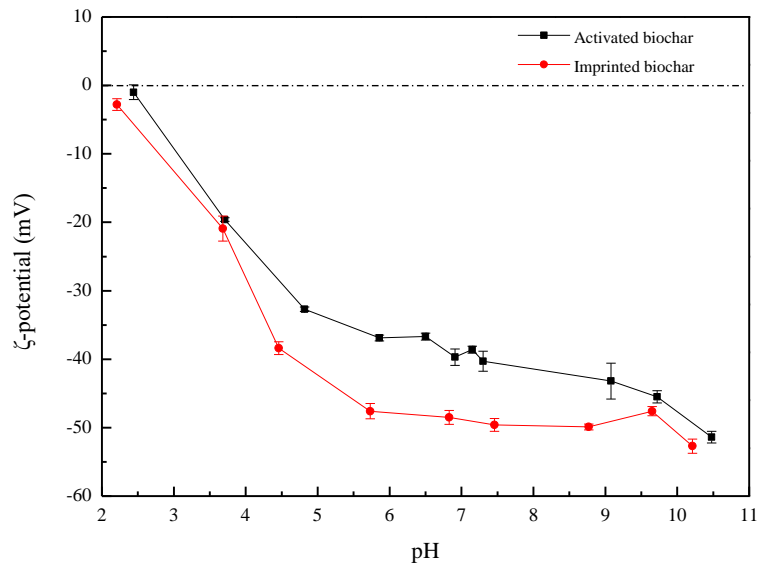

Figure S2 Zeta-potentials of activated biochar and imprinted biochar.

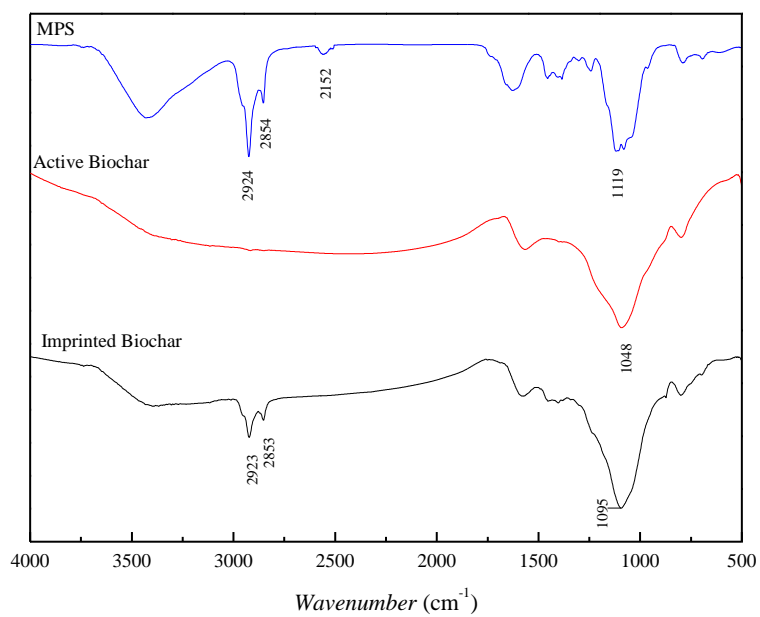

**Figure S3** FT-IR spectra of MPS, activated biochar, and imprinted biochar.

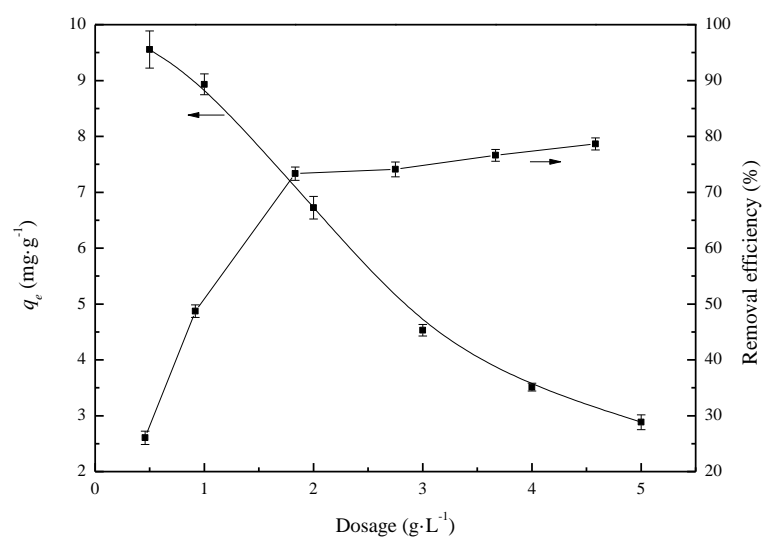

**Figure S4** Effect of sorbent dosage on adsorption capacity of SRFB to Cd(II).

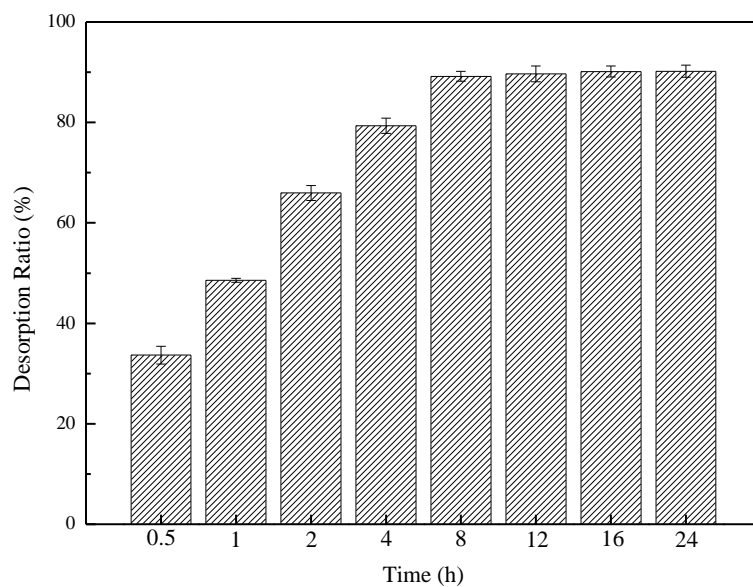

**Figure S5** The relation between desorption ratios and desorption time.

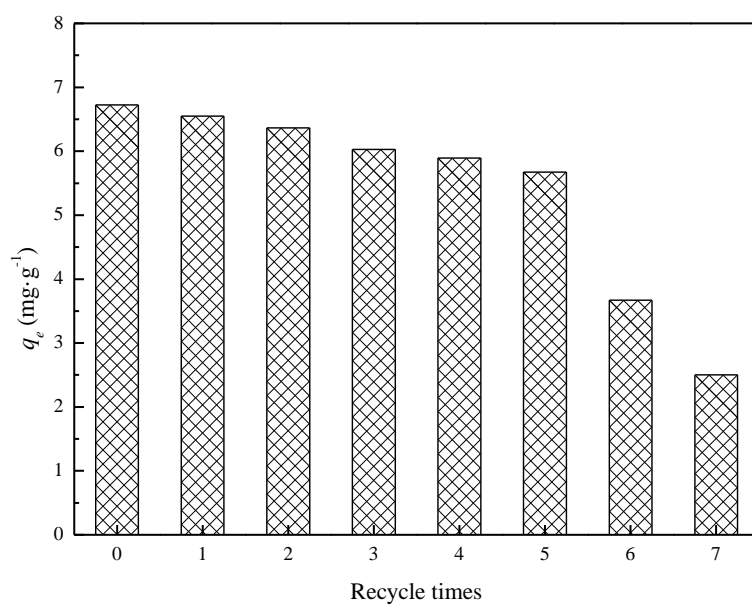

**Figure S6** The relation between adsorption-desorption cycle and absorption capacity.

**Table S1** The selectivity parameters of Cd(II) adsorption on IB and NIB.

| Metals Ions   | Sorbents | $K_d$      |            | $k$  | $\eta$ |
|---------------|----------|------------|------------|------|--------|
|               |          | $K_d$ (Cd) | $K_d$ (Me) |      |        |
| Cd(II)/Cu(II) | BS*      | 163.21     | 145.73     | 1.12 | 5.37   |
|               | IB       | 1287.74    | 214.13     | 6.01 | 6.06   |
|               | N-IB     | 249.05     | 250.88     | 0.99 |        |
| Cd(II)/Zn(II) | BS       | 172.61     | 166.28     | 1.04 | 5.85   |

|               |      |         |        |      |      |
|---------------|------|---------|--------|------|------|
|               | IB   | 1253.71 | 206.20 | 6.08 | 5.99 |
|               | N-IB | 189.63  | 186.43 | 1.02 |      |
| Cd(II)/Co(II) | BS   | 186.22  | 195.54 | 0.95 | 6.50 |
|               | IB   | 1267.82 | 188.95 | 6.71 | 6.81 |
|               | N-IB | 209.58  | 212.67 | 0.99 |      |
| Cd(II)/Pb(II) | BS   | 142.41  | 148.33 | 0.96 | 6.10 |
|               | IB   | 1205.61 | 205.65 | 5.86 | 8.05 |
|               | N-IB | 170.59  | 234.25 | 0.73 |      |

\*BS: Biochar based

### Figure 5b equations

Initial Cd(II) concentration  $C_t = 1 \times 10^{-4} \text{ mol} \cdot \text{L}^{-1}$

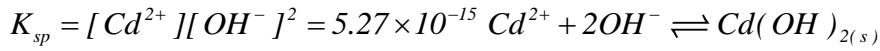

So precipitation at  $pH \approx 7.75$ .

1. When pH is less than 7.75,

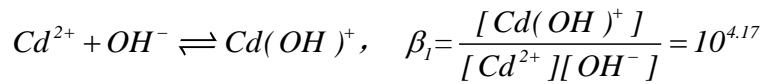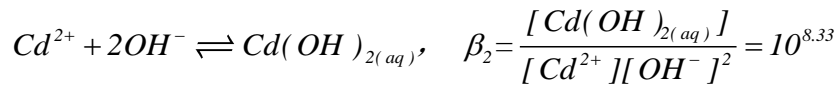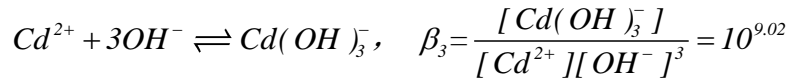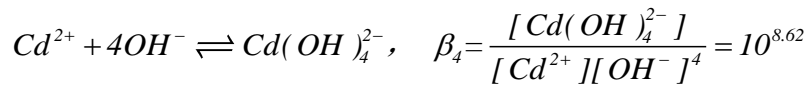

To:

$$\begin{aligned} \lg[Cd^{2+}] &= \lg C_T - \lg(1 + \beta_1[OH^-] + \beta_2[OH^-]^2 + \beta_3[OH^-]^3 + \beta_4[OH^-]^4) \\ &= -2 - \lg(1 + 10^{pH-9.87} + 10^{2pH-19.67} + 10^{3pH-32.98} + 10^{4pH-45.38}) \end{aligned}$$

$$\lg[Cd(OH)^+] = \lg \beta_1 + \lg[Cd^{2+}] + \lg[OH^-] = -9.87 + pH + \lg[Cd^{2+}]$$

$$\lg[Cd(OH)_{2(aq)}] = \lg \beta_2 + \lg[Cd^{2+}] + 2\lg[OH^-] = -19.67 + 2pH + \lg[Cd^{2+}]$$

$$\lg[Cd(OH)_3^-] = \lg \beta_3 + \lg[Cd^{2+}] + 3\lg[OH^-] = -32.98 + 3pH + \lg[Cd^{2+}]$$

$$\lg[Cd(OH)_4^{2-}] = \lg \beta_4 + \lg[Cd^{2+}] + 4\lg[OH^-] = -45.35 + 4pH + \lg[Cd^{2+}]$$

2. When pH is greater than 7.75,

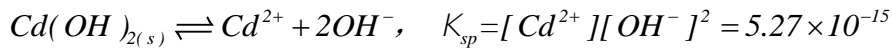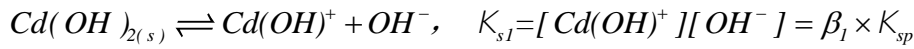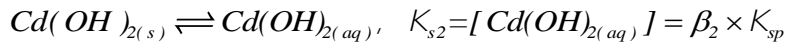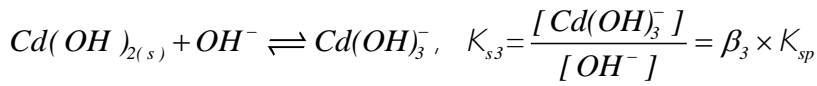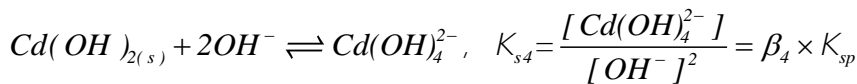

To:

$$\lg [Cd^{2+}] = \lg K_{sp} - 2 \lg [OH^{-}] = -14.28 - 2 \lg [OH^{-}] = 13.72 - 2 \text{pH}$$

$$\lg [Cd(OH)^{+}] = \lg K_{s1} - \lg [OH^{-}] = -13.66 - \lg [OH^{-}] = 0.34 - \text{pH}$$

$$\lg [Cd(OH)_{2(aq)}] = \lg K_{s2} = -13.36$$

$$\lg [Cd(OH)_3^{-}] = \lg K_{s3} + \lg [OH^{-}] = -13.32 - \lg [OH^{-}] = -27.32 + \text{pH}$$

$$\lg [Cd(OH)_4^{2-}] = \lg K_{s4} + 2 \lg [OH^{-}] = -13.34 + 2 \lg [OH^{-}] = -41.34 + 2 \text{pH}$$

$$\lg [Cd(OH)_{2(s)}] = \lg (C_T - [Cd^{2+}] - [Cd(OH)^{+}] - [Cd(OH)_{2(aq)}] - [Cd(OH)_3^{-}] - [Cd(OH)_4^{2-}])$$
